# Supplementary material
Source: MDPI journal article supplement (https://www.mdpi.com/2073-4395/13/3/937)
Supplement: s1 [file s1]

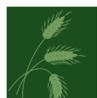

Article

# Very Early Biomarkers Screening for Water Deficit Tolerance in Commercial *Eucalyptus* Clones

Thais R. Corrêa <sup>1</sup>, Edgard Augusto de T. Picoli <sup>2,\*</sup>, Washington Luiz Pereira <sup>2</sup>, Samyra A. Condé <sup>3</sup>, Rafael T. Resende <sup>4,5</sup>, Marcos Deon V. de Resende <sup>6,7</sup>, Weverton Gomes da Costa <sup>8</sup>, Cosme Damião Cruz <sup>8</sup> and Edival Angelo V. Zauza <sup>9</sup>

<sup>1</sup> Departamento de Fitotecnia e Fitossanidade, Universidade Estadual do Maranhão, São Luis 65055-310, MA, Brazil

<sup>2</sup> Departamento de Biologia Vegetal, Universidade Federal de Viçosa, Viçosa 36570-900, MG, Brazil

<sup>3</sup> Departamento de Agronomia, Universidade Federal de Viçosa, Viçosa 36570-900, MG, Brazil

<sup>4</sup> Escola de Agronomia (EA), Universidade Federal de Goiás, Goiânia 74690-900, GO, Brazil

<sup>5</sup> Departamento de Engenharia Florestal, Universidade de Brasília (UnB), Brasília 70910-900, DF, Brazil

<sup>6</sup> Departamento de Engenharia Florestal, Universidade Federal de Viçosa, Viçosa 36570-900, MG, Brazil

<sup>7</sup> EMBRAPA Café, Brasília 70770-901, DF, Brazil

<sup>8</sup> Departamento de Biologia Geral, Universidade Federal de Viçosa, Viçosa 36570-900, MG, Brazil

<sup>9</sup> Suzano S/A, Salvador 41810-012, BA, Brazil

\* Correspondence: epicoli@ufv.br

**Supplementary Table S1.** Estimation of genotypic parameters from the analysis of 22\* *Eucalyptus* clones submitted to water stress (100H<sub>2</sub>O and 300PEG) and CONTROL treatments in relation to morphological, nutritional and physiological traits.

| Variables | Parameters       |                   |        |                    |       |       |        |        |
|-----------|------------------|-------------------|--------|--------------------|-------|-------|--------|--------|
|           | h <sup>2</sup> g | h <sup>2</sup> mg | Accgen | C <sub>2</sub> int | rgloc | CVgi% | CVe%   | A      |
| PH        | 0.22             | 0.71              | 0.84   | 0.02               | 0.90  | 7.01  | 12.9   | 70.53  |
| SD        | 0.13             | 0.54              | 0.74   | 0.05               | 0.70  | 3.76  | 9.42   | 6.58   |
| ID        | 0.35             | 0.79              | 0.89   | 0.08               | 0.80  | 16.76 | 21.16  | 201.30 |
| K         | 0.15             | 0.60              | 0.77   | 0.00               | 0.95  | 16.46 | 39.79  | 38.30  |
| Mg        | 0.12             | 0.49              | 0.70   | 0.11               | 0.51  | 4.84  | 116.11 | 24.72  |
| S         | 0.19             | 0.66              | 0.81   | 0.03               | 0.84  | 55.63 | 113.18 | 24.02  |
| Cu        | 0.32             | 0.78              | 0.89   | 0.05               | 0.86  | 64.42 | 90.65  | 15.45  |
| Fe        | 0.21             | 0.69              | 0.83   | 0.02               | 0.88  | 44.15 | 84.15  | 16.71  |
| Zn        | 0.43             | 0.82              | 0.90   | 0.14               | 0.75  | 19.39 | 19.23  | 29.47  |
| B         | 0.39             | 0.81              | 0.90   | 0.10               | 0.79  | 18.26 | 20.58  | 642.05 |
| gs(1)     | 0.43             | 0.83              | 0.91   | 0.10               | 0.80  | 15.41 | 15.94  | 87.85  |

h<sup>2</sup>g: Heritability of individual plants in the broad sense; h<sup>2</sup>mg: Heritability of the genotype average; Accgen: Accuracy of genotype selection; C<sub>2</sub>int: Coefficient of determination of the effects of genotype x environment interaction; rgloc: genotype correlation between performance in the various environments; CVgi%: genotype coefficient of variation; CVe%: coefficient of residual variation; A: overall average of the experiment. PH – plant height, SD – stem diameter, ID – increment in stem diameter, concentrations of the nutrients potassium – K, magnesium – Mg, sulfur – S, copper – Cu, iron – Fe, zinc – Zn, boron – B, and physiological trait; stomatal conductivity at the 30<sup>th</sup> day of the experiment (first evaluation) – gs(1).

\*Initial analysis was performed for 19 commercial and further 3 eucalypt genotypes that were selected from other experiments and at initial testing phase.

**Supplementary Table S2.** Average, standard deviation (SD) and coefficient of variation (CV) from three replications of *Eucalyptus* clones submitted to treatments with water stress (100H<sub>2</sub>O and 300PEG) and control treatment in relation to the morphological, nutritional and physiological traits in an experiment in a completely randomized block design and split plot arrangement.

| CONTROL TREATMENT    |        |                  |                   |               |                 |                |               |               |               |
|----------------------|--------|------------------|-------------------|---------------|-----------------|----------------|---------------|---------------|---------------|
| Clone                |        | PH               | LA                | ID            | IH              | N              | K             | Ca            | Mg            |
|                      | E-01 S | 81.3333±13.5769  | 227.0967±13.7981  | 4.6333±0.5518 | 44.0000±11.0000 | 0.7986±0.0234  | 1.2050±0.1125 | 0.8460±0.2842 | 0.4473±0.0942 |
|                      | E-02 T | 78.0000±19.5192  | 338.0500±3.2575   | 4.7900±0.4392 | 50.1667±18.7649 | 0.93233±0.0445 | 0.9600±0.0229 | 0.8350±0.1579 | 0.4636±0.0301 |
|                      | E-03 T | 80.6667±5.7735   | 205.5700±33.2091  | 5.9567±0.9376 | 52.5667±4.5081  | 1.1130±0.1334  | 1.3187±0.2417 | 0.8373±0.2754 | 0.5180±0.1119 |
|                      | E-04 S | 89.3333±14.5717  | 261.2867±9.6050   | 5.1917±0.5302 | 60.0000±12.1392 | 1.2933±0.3127  | 1.3737±0.1353 | 1.0150±0.1015 | 0.4947±0.0669 |
|                      | E-05 S | 85.6667±10.2144  | 214.6133±15.3886  | 4.8833±0.9808 | 37.6667±11.0604 | 0.9170±0.0322  | 1.1250±0.0740 | 0.8393±0.1793 | 0.5287±0.0619 |
|                      | E-06 T | 99.0000±7.0000   | 226.2167±13.8884  | 4.8900±0.7938 | 64.5000±3.6056  | 1.2723±0.0092  | 0.9300±0.0346 | 0.8950±0.1788 | 0.3867±0.0487 |
|                      | E-07 S | 76.0000±7.8102   | 254.4133±14.2156  | 5.1567±2.0149 | 48.0667±13.9665 | 1.0100±0.1784  | 1.4573±0.2455 | 1.6167±0.0521 | 0.6227±0.0654 |
|                      | E-08 T | 75.6667±10.1160  | 238.8733±10.7346  | 4.8850±1.2473 | 55.1000±8.8386  | 1.1900±0.1926  | 1.0450±0.0150 | 0.7793±0.2095 | 0.3983±0.0191 |
|                      | E-09 S | 88.3333±5.0332   | 223.7567±2.7104   | 4.8583±1.4657 | 60.5000±4.8218  | 1.2260±0.1852  | 1.0600±0.0835 | 1.0250±0.1996 | 0.5260±0.0978 |
|                      | E-10 T | 88.6667±18.1750  | 218.4067±26.1196  | 6.0750±0.5074 | 64.1000±21.1922 | 1.2160±0.2481  | 1.2250±0.0984 | 0.9770±0.2505 | 0.5480±0.0658 |
|                      | E-11 T | 91.6667±8.9629   | 260.7067±24.5632  | 4.8183±0.5659 | 53.3333±5.8595  | 0.9943±0.0497  | 1.2450±0.0606 | 0.7783±0.1066 | 0.5660±0.0571 |
|                      | E-12 T | 89.0000±16.0000  | 331.1767±52.1804  | 5.3283±1.0584 | 62.0000±16.2558 | 1.0613±0.2487  | 1.2600±0.0676 | 1.1047±0.1777 | 0.5190±0.0456 |
|                      | E-13 S | 100.3333±15.0111 | 255.0067±44.5318  | 4.7917±0.2454 | 77.0000±12.5797 | 1.2880±0.2902  | 1.0350±0.1561 | 1.0490±0.1394 | 0.5187±0.0251 |
|                      | E-14 T | 98.0000±9.1652   | 286.0333±27.3919  | 5.2067±0.7786 | 62.7667±9.4659  | 1.0820±0.1118  | 1.1750±0.1503 | 0.7540±0.1883 | 0.3763±0.0305 |
|                      | E-15 S | 75.0000±9.1652   | 223.3933±36.0046  | 6.2733±0.7039 | 45.0000±16.3771 | 1.1490±0.1698  | 1.2700±0.1447 | 1.1287±0.2505 | 0.5417±0.0484 |
|                      | E-16 T | 93.6667±11.9303  | 203.7867±157.8541 | 6.0100±0.5227 | 69.6667±13.2035 | 1.1127±0.1545  | 1.2200±0.0433 | 1.1060±0.3081 | 0.5457±0.0661 |
|                      | E-17 T | 91.0000±26.8887  | 258.9567±74.0143  | 4.600±1.2823  | 65.8333±25.8473 | 1.1797±0.2073  | 1.5610±0.1418 | 1.0887±0.2775 | 0.4407±0.0633 |
|                      | E-18 T | 93.6667±8.1445   | 347.3967±40.9876  | 4.0750±0.4246 | 64.6667±7.4889  | 0.9583±0.1545  | 1.3187±0.1767 | 0.5820±0.0783 | 0.3157±0.0172 |
|                      | E-19 S | 89.6667±1.5275   | 255.2333±85.5253  | 5.9850±1.1036 | 65.8333±7.0770  | 0.9943±0.1960  | 1.2887±0.2079 | 1.0233±0.1383 | 0.4963±0.1445 |
| average±SD (control) |        | 87.6140±7.9297   | 254.2091±43.5604  | 5.1794±0.6061 | 58.0404±9.9746  | 1.0941±0.1400  | 1.2144±0.1630 | 0.9621±0.2175 | 0.4871±0.0764 |
| CV (control)         |        | 9.0507           | 17.1357           | 11.7022       | 17.1856         | 12.7992        | 13.4189       | 22.6029       | 15.6801       |

| Clone | S | Cu | Zn | Mn | B | A(1) | gs(1) |
|-------|---|----|----|----|---|------|-------|
|-------|---|----|----|----|---|------|-------|

|                             |                      |                      |                       |                          |                        |                      |                      |
|-----------------------------|----------------------|----------------------|-----------------------|--------------------------|------------------------|----------------------|----------------------|
| E-01 S                      | 0.1453±0.0271        | 2.7500±0.2783        | 17.0833±2.6468        | 588.4500±120.9385        | 70.7506±12.6606        | 5.1211±1.5586        | 0.0875±0.0814        |
| E-02 T                      | 0.2186±0.0152        | 6.8333±0.5299        | 31.5333±10.2109       | 441.1166±54.7761         | 71.4226±8.3121         | 6.7426±3.1922        | 0.0927±0.0454        |
| E-03 T                      | 0.2083±0.0586        | 5.5667±1.6073        | 22.9833±2.7970        | 733.1833±99.6431         | 103.1180±20.0056       | 8.2029±2.5522        | 0.1496±0.0739        |
| E-04 S                      | 0.2007±0.0153        | 9.7667±2.1865        | 34.1167±6.1892        | 602.7500±293.9926        | 87.4133±7.7416         | 7.8616±0.3625        | 0.0887±0.0227        |
| E-05 S                      | 0.2527±0.0050        | 4.2833±0.0577        | 22.0000±1.7385        | 650.0667±19.5395         | 87.9333±7.8585         | 9.2866±1.1863        | 0.1858±0.1004        |
| E-06 T                      | 0.1473±0.0186        | 3.2333±0.2754        | 15.2167±2.1097        | 561.6667±244.1549        | 83.4340±9.2727         | 7.9787±3.9519        | 0.2070±0.0568        |
| E-07 S                      | 0.3563±0.1206        | 7.9000±1.8682        | 44.9167±5.9637        | 721.3167±91.9536         | 108.6633±14.1723       | 8.4873±2.5901        | 0.1235±0.0434        |
| E-08 T                      | 0.1790±0.0499        | 4.0500±0.5292        | 38.6167±9.9168        | 450.7167±97.5635         | 100.7940±28.9725       | 7.3976±2.0841        | 0.1721±0.1325        |
| E-09 S                      | 0.2117±0.0395        | 7.0167±1.9035        | 36.1833±3.3632        | 615.0667±176.7506        | 95.1753±8.1011         | 11.9758±2.0082       | 0.3315±0.1934        |
| E-10 T                      | 0.2923±0.0444        | 5.0167±0.6331        | 20.6333±3.5392        | 842.3167±241.6634        | 133.1730±36.4593       | 8.6594±3.8341        | 0.2681±0.0718        |
| E-11 T                      | 0.2650±0.0608        | 5.9333±1.1558        | 27.1833±4.0263        | 605.7333±15.5327         | 79.8023±12.9720        | 7.3107±2.0620        | 0.1192±0.0462        |
| E-12 T                      | 0.2470±0.0455        | 7.8500±2.9013        | 23.6000±9.8759        | 828.5167±97.6453         | 89.2583±2.2139         | 8.1915±2.8663        | 0.1342±0.0277        |
| E-13 S                      | 0.2077±0.0528        | 5.0333±0.1041        | 24.6833±3.8070        | 622.3167±116.8338        | 83.7537±3.6698         | 9.4564±4.4057        | 0.3570±0.2713        |
| E-14 T                      | 0.1523±0.0194        | 5.0833±0.6331        | 19.1333±3.5519        | 493.5333±143.2128        | 95.4397±5.0604         | 10.5348±2.7015       | 0.3422±0.2060        |
| E-15 S                      | 0.3077±0.1242        | 7.0167±0.8694        | 28.1000±4.0457        | 658.9167±287.2198        | 111.2683±8.4865        | 6.3531±2.6275        | 0.1310±0.0513        |
| E-16 T                      | 0.2973±0.0458        | 5.2667±1.5495        | 32.6500±10.2654       | 703.7667±145.9077        | 92.6173±3.5071         | 5.5670±0.8785        | 0.0681±0.0118        |
| E-17 T                      | 0.1683±0.0323        | 6.8833±1.3967        | 42.3833±6.1855        | 619.4833±104.8569        | 96.2067±12.3586        | 5.7476±0.8907        | 0.0865±0.0653        |
| E-18 T                      | 0.1280±0.0164        | 5.0500±0.6946        | 28.4667±4.3819        | 483.7000±140.2780        | 73.5827±8.7841         | 5.4771±4.0084        | 0.0912±0.0370        |
| E-19 S                      | 0.2757±0.0760        | 4.0833±1.4145        | 26.1833±10.7896       | 436.8167±146.5568        | 121.0650±21.1280       | 4.9673±1.4025        | 0.0921±0.0862        |
| <b>average±SD (control)</b> | <b>0.2243±0.0637</b> | <b>5.7167±1.7678</b> | <b>28.1930±8.3491</b> | <b>613.6544±119.8060</b> | <b>93.9406±16.5122</b> | <b>7.6480±1.8915</b> | <b>0.1646±0.0938</b> |
| <b>CV (control)</b>         | <b>28.4019</b>       | <b>30.9233</b>       | <b>29.6142</b>        | <b>19.5234</b>           | <b>17.5772</b>         | <b>24.7313</b>       | <b>56.9813</b>       |

**Supplementary Table S3.** Average water potential (MPa) of leaves of 19 commercial clones submitted to control treatment and water deficit simulation based on water restriction (100 H<sub>2</sub>O) and application of polyethylene glycol solution (300 PEG). The water potential was accessed in two periods, from 3:00 am to 5:00 am (dawn) and from 1:00 pm to 3:00 pm (afternoon).

| Clone  | Treatment | Water potential |            |            |            |              |            |
|--------|-----------|-----------------|------------|------------|------------|--------------|------------|
|        |           | Control         |            | 300 PEG    |            | 100 ml water |            |
|        |           | dawn            | afternoon  | dawn       | afternoon  | dawn         | afternoon  |
| E-01 S |           | -0.08±0.14      | -0.58±0.16 | -0.48±0.52 | -1.08±1.21 | -0.45±0.10   | -1.10±0.35 |
| E-02 T |           | -0.08±0.14      | -0.42±0.10 | -1.43±0.31 | -1.50±0.35 | -0.68±0.32   | -1.43±0.28 |
| E-03 T |           | -0.35±0.05      | -0.57±0.20 | -1.37±0.03 | -1.68±0.13 | -0.35±0.10   | -1.10±0.15 |
| E-04 S |           | -0.10±0.17      | -0.67±0.20 | -1.12±0.56 | -1.48±0.87 | -0.38±0.13   | -1.05±0.48 |
| E-05 S |           | -0.25±0.23      | -0.85±0.13 | -0.62±0.64 | -1.77±0.95 | -0.53±0.09   | -0.85±0.38 |
| E-06 T |           | -0.10±0.17      | -0.58±0.08 | -1.03±0.09 | -1.37±0.43 | -0.33±0.03   | -0.93±0.38 |
| E-07 S |           | -0.35±0.05      | -0.68±0.20 | -0.15±0.28 | -0.38±0.38 | -0.42±0.08   | -0.63±0.23 |
| E-08 T |           | -0.12±0.20      | -0.47±0.20 | -0.62±0.17 | -1.27±0.94 | -0.48±0.25   | -1.15±0.30 |
| E-09 S |           | -0.17±0.14      | -0.58±0.13 | -0.92±0.13 | -1.23±0.24 | -0.33±0.08   | -0.83±0.18 |
| E-10 T |           | -0.13±0.23      | -0.50±0.15 | -0.78±0.61 | -1.03±0.58 | -0.43±0.06   | -1.05±0.15 |
| E-11 T |           | -0.27±0.03      | -0.65±0.13 | -0.97±0.69 | -1.35±0.65 | -0.65±0.35   | -1.15±0.30 |
| E-12 T |           | -0.17±0.14      | -0.52±0.03 | -0.63±0.36 | -1.10±0.76 | -0.38±0.06   | -0.63±0.08 |
| E-13 S |           | -0.23±0.20      | -0.65±0.23 | -0.93±0.20 | -1.37±0.48 | -0.43±0.08   | -0.93±0.48 |
| E-14 T |           | 0.00±0.00       | -0.60±0.23 | -0.77±0.52 | -1.08±0.92 | -0.47±0.08   | -1.08±0.38 |
| E-15 S |           | -0.27±0.23      | -0.68±0.28 | -0.42±0.60 | -1.10±0.28 | -0.48±0.14   | -0.72±0.23 |
| E-16 T |           | -0.37±0.06      | -0.70±0.35 | -0.72±0.38 | -1.08±0.12 | -0.45±0.10   | -0.80±0.10 |
| E-17 T |           | -0.18±0.28      | -0.50±0.15 | -0.43±0.53 | -0.58±0.65 | -0.52±0.00   | -0.95±0.20 |
| E-18 T |           | -0.10±0.20      | -0.65±0.38 | -0.33±0.23 | -0.83±0.56 | -0.40±0.03   | -0.73±0.03 |
| E-19 S |           | -0.20±0.16      | -0.50±0.33 | -0.58±0.26 | -1.05±0.28 | -0.65±0.26   | -1.20±0.23 |

---

T = tolerant to water deficit; S = susceptible to water deficit. Control treatment – daily irrigation according to the nursery protocol; 300 PEG treatment – irrigation as in Control in addition to the application of 100 ml solution of 300 g L<sup>-1</sup> PEG 6000; and 100 H<sub>2</sub>O treatment – irrigation restricted to 100 ml H<sub>2</sub>O daily. Average ± standard deviation **Disclaimer/Publisher's Note:** The statements, opinions and data contained in all publications are solely those of the individual author(s) and contributor(s) and not of MDPI and/or the editor(s). MDPI and/or the editor(s) disclaim responsibility for any injury to people or property resulting from any ideas, methods, instructions or products referred to in the content.
